# Supplementary material for: Electrochemical detection of PCR amplicons of Escherichia coli genome based on DNA nanostructural probes and polyHRP enzyme
Source: Royal Society of Chemistry journal article supplement (doi:10.1039/c6an01435f), 2016-01-01
Supplement: c6an01435f1.pdf [file c6an01435f1.pdf]

Supporting Information for:

Electrochemical detection of PCR amplicons of Escherichia coli genome based on DNA nanostructural probes and polyHRP enzyme

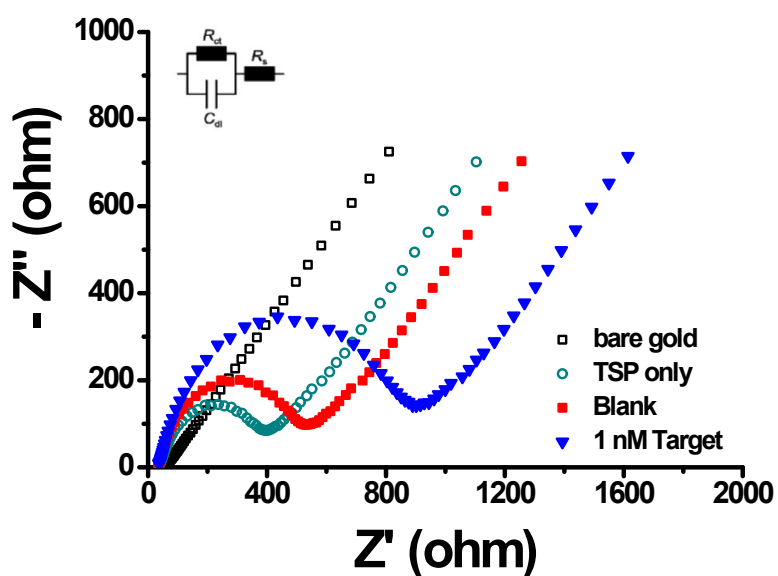

**Fig. S1** EIS characterization of the assemble process: (a) bare gold, (b) gold electrode modified with TSP probe, (c) TSP probe modified electrode hybridized only with signal probe, (d) TSP probe modified electrode hybridized with signal probe and 1 nM target DNA. The parameters are as following: Init E (V) = 0.248, High Frequency (Hz) =  $1e+5$ , Low Frequency (Hz) = 0.1, Amplitude (V) = 0.005,

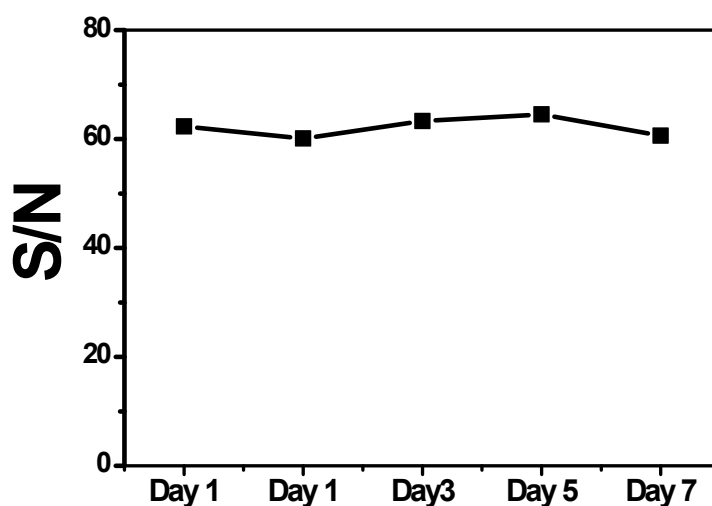

**Fig S2.** The stability of the TSP-modified electrode: the electrodes showed stable signal/noise (S/N) for at least 7days under 4 °C storage. The target concentration was 1pM.

**Table S1.** the results of Inter- and Intra-Assay precision test of our biosensor.

|                  | S/N     |         |         |
|------------------|---------|---------|---------|
|                  | Group 1 | Group 2 | Group 3 |
| 1                | 61.3    | 62.3    | 62.2    |
| 2                | 60.3    | 62.0    | 64.7    |
| 3                | 60.0    | 60.4    | 63.8    |
| 4                | 64.3    | 63.4    | 60.7    |
| 5                | 63.1    | 61.2    | 60.1    |
| 6                | 60.8    | 65.4    | 61.1    |
| SD(inter assay)  | 1.5     | 1.6     | 1.7     |
| RSD(inter assay) | 2.5%    | 2.6%    | 2.7%    |
| SD(intra assay)  | 1.6     |         |         |
| RSD(intra assay) | 2.6%    |         |         |

\*The concentration of the target in this experiment was 1 nM.

SD: standard deviation, RSD: relative standard deviation.

Inter-Assay: results in one group of data.

Intra-assay: results between 3 groups of data.
